# Supplementary material
Source: Springer Nature journal article supplement (https://www.springermedizin.de/resource/supplementary/12984_2012_418_MOESM3_ESM.pdf/9604532)

A

| Therapeutic Goals                                                             | Activity Categories    | Example Activities                                                                                                |                                                                                                                                              |
|-------------------------------------------------------------------------------|------------------------|-------------------------------------------------------------------------------------------------------------------|----------------------------------------------------------------------------------------------------------------------------------------------|
|                                                                               |                        | Low Level                                                                                                         | High Level                                                                                                                                   |
| 1.<br>Establish normal scapulothoracic/humeral rhythm and stability           | 1 Water task           | Pour ½ cup of water from measuring cup to wide mouth glass held in opposite hand.                                 | Pour 2 cups of water from narrow mouth flask into small (6 oz.) glasses held in opposite hand.                                               |
|                                                                               | 2 Catch/Release        | Bounce ball/balloon on floor with both hands (i.e., bounce pass, 4-square).                                       | Throw & catch using ball & velcro mitt. Participant to remove ball from mitt. Therapist varies speed & range of throwing.                    |
| 2.<br>Incorporate movement against gravity                                    | 3 Drawing/Writing      | Using large diameter paint jar, shake/mix with both hands. Open lid (alternate stabilizing & manipulation hands). | Paint using paint brush and palette. Painting surface mounted on wall or easel to vary height. Vary brush size & length.                     |
|                                                                               | 4 Tool Task            | Use 3-hole punch at desktop height to prepare documents for 3-ring binders.                                       | Work threaded fasteners (screws), varied dimensions with different types of screwdriver (straight, Phillips, hex). Shoulder height or above. |
| 3.<br>Incorporate shoulder external rotation & stretch to long finger flexors | 5 Laundry/Dressing     | Lift, carry and move a laundry basket. Vary weight & volume.                                                      | Don and fasten a belt around the waist.                                                                                                      |
|                                                                               | 6 Sport                | Hold golf club with both hands and putt to large "cup". Vary size of ball as necessary.                           | Bat ball with whiffle ball and bat. Vary height and speed. Build up bat handle as necessary.                                                 |
| 4.<br>Incorporate bimanual movements                                          | 7 Feeding/Cooking      | Open large ziploc bag of chips/cereal/foam peanuts. Pour into wide bowl.                                          | Use knife & fork simultaneously to cut theraputty into 6, or more, pieces.                                                                   |
|                                                                               | 8 Board games/cards    | Deal/set-up solitary game holding card deck in one hand, placing cards with the other.                            | Card game. Slide dealt cards to edge of table & transfer to opposite hand. Form & hold a playing hand.                                       |
| 5a.<br>Weight bearing through UE in shoulder ER, wrist ext, finger ext        | 9 Computer/keyboarding | Type simple paragraph with proper punctuation (use of control keys). Forearms resting on desktop.                 | Play computer tracking game (low level). Mouse or game controller built-up as necessary. Forearms not resting on desktop.                    |
| 5b.<br>Incorporate reaching and manipulation through goal-directed movements. |                        |                                                                                                                   |                                                                                                                                              |
| 6.<br>Incorporate controlled elbow movement                                   |                        |                                                                                                                   |                                                                                                                                              |

B

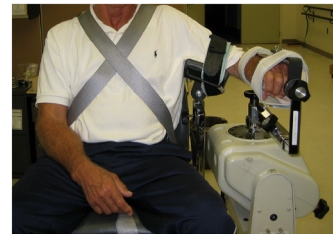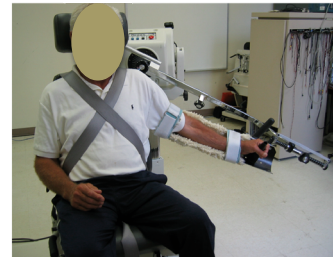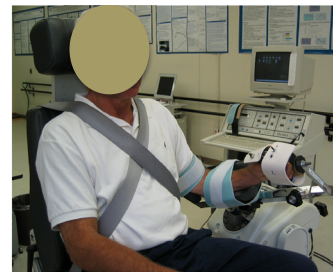

C

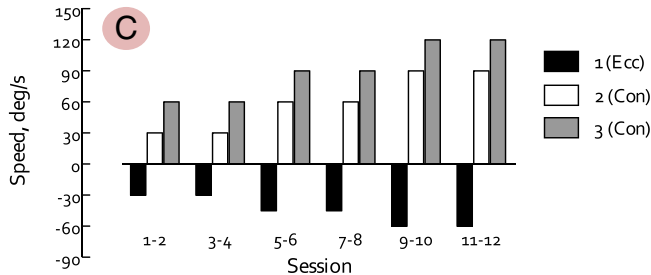

Supplement: MOESM3 [file 9604532]
